# Supplementary material for: Prediction of Parkinson’s Disease Using Machine Learning Methods
Source: Biomolecules. 2023 Dec 8;13(12):1761. doi: 10.3390/biom13121761 (PMC10741603; doi:10.3390/biom13121761)
Supplement: Supplementary file 1 [file biomolecules-13-01761-s001.zip › biomolecules-2680513-supplementary.pdf]

## Article

# Prediction of Parkinson's Disease Using Machine Learning Methods

Jiayu Zhang <sup>1</sup>, Wenchao Zhou <sup>1</sup>, Hongmei Yu <sup>1</sup>, Tong Wang <sup>1</sup>, Xiaqiong Wang <sup>2</sup>, Long Liu <sup>1,\*</sup> and Yalu Wen <sup>3,\*</sup>

<sup>1</sup> Department of Health Statistics, School of Public Health, Shanxi Medical University, No 56 Xinjian South Road, Yingze District, Taiyuan 030001, China; zjiayu0217@gmail.com (J.Z.); zhouwenchao157@gmail.com (W.Z.); yu@sxmu.edu.cn (H.Y.); tongwang@sxmu.edu.cn (T.W.)

<sup>2</sup> Department of Epidemiology and Biostatistics, Southeast University, 87 Ding Jiaqiao Road, Nanjing 210009, China; xiaqiong.wang@auckland.ac.nz

<sup>3</sup> Department of Statistics, University of Auckland, 38 Princes Street, Auckland Central, Auckland 1010, New Zealand

\* Correspondence: biostat-ll@sxmu.edu.cn (L.L.); y.wen@auckland.ac.nz (Y.W.)

## Supplementary Figures

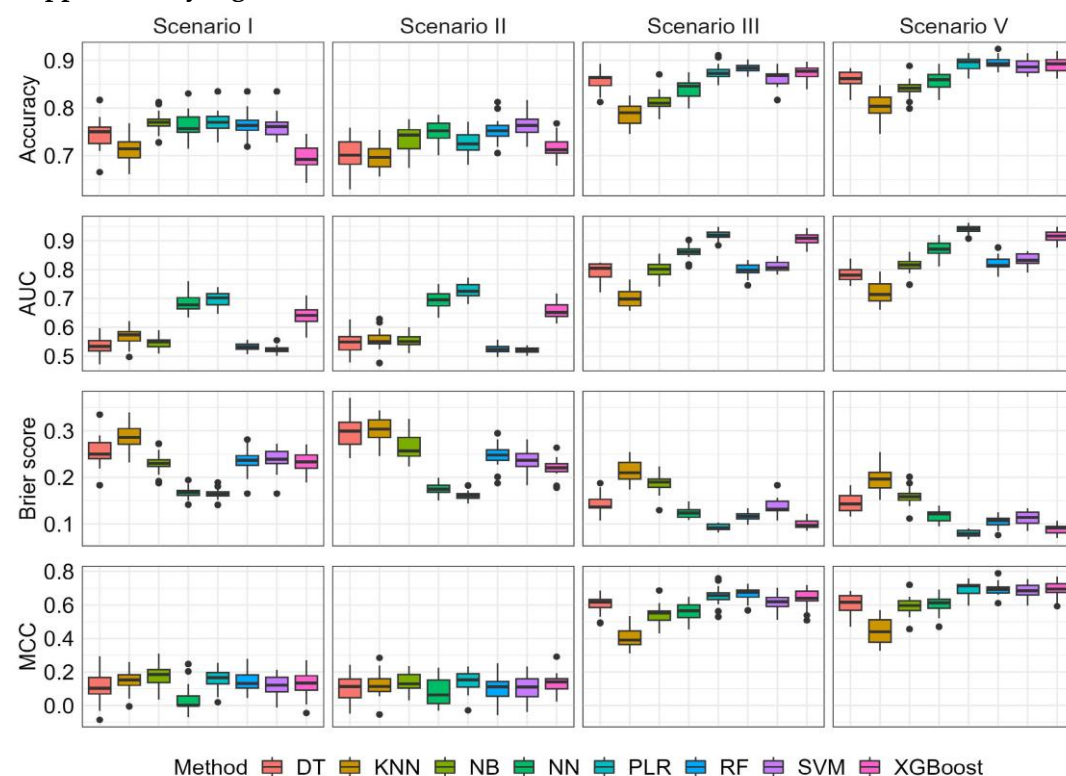

**Figure S1.** The comparisons of accuracy, area under the curve (AUC), Brier score, and Matthews Correlation Coefficient (MCC) among different ML methods. ML methods include decision tree (DT), K Nearest Neighbors (KNN), naïve Bayes (NB), neural network (NN), penalized logistic regression (PLR), random forest (RF), support vector machine (SVM), and Extreme Gradient Boosting (XGBoost). The scenarios assessed were as follows: Scenario I: demographic, Scenario II: demographic + hospital admission examinations, Scenario III: demographic + hospital admission examinations + clinical assessments, Scenario V: demographic + hospital admission examinations + clinical assessments + PRS + biomarkers.

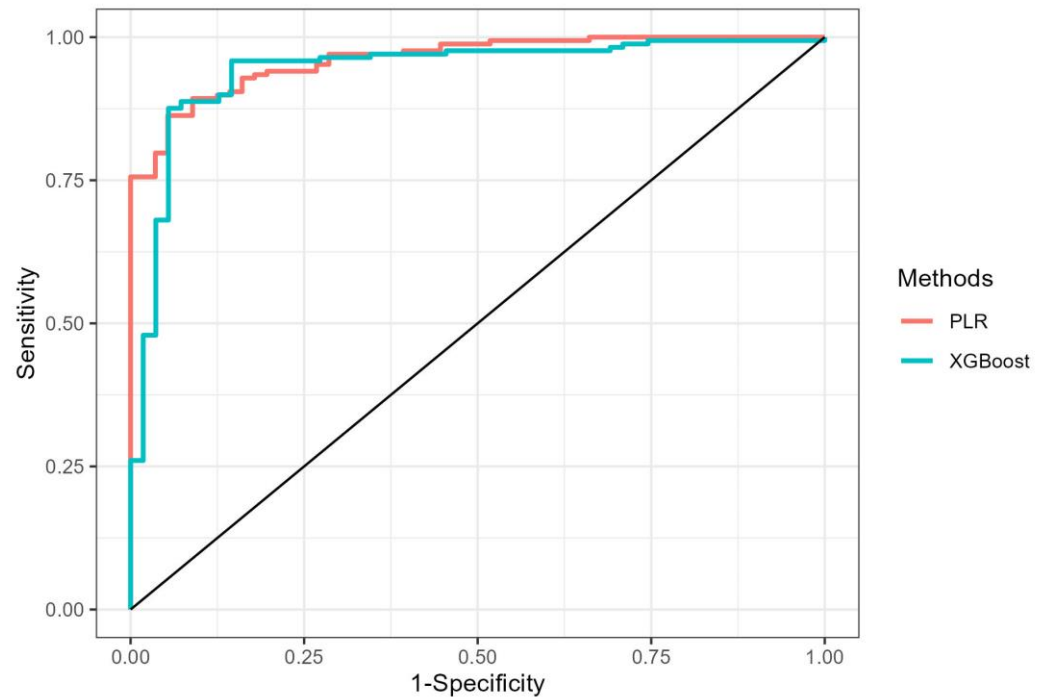

**Figure S2.** The Receiver Operating Characteristic curve that is derived from the best PD risk prediction models built by the penalized logistic regression and XGBoost methods. Predictors included in the models are demographic variables, hospital admission examinations, clinical assessments, and PRS.

### Supplementary Tables

**Table S1.** Summary of the machine learning algorithms.

| Algorithm name                | Package                      | Parameters                                                                                                                    |
|-------------------------------|------------------------------|-------------------------------------------------------------------------------------------------------------------------------|
| Decision tree                 | rpart package 4.1.19         | Default                                                                                                                       |
| Support Vector Machine        | e1071 package 1.7.13         | kernel: 'radial', gamma: $10^{-6} \sim 10^{-2}$ , cost: $10^2 \sim 10^6$                                                      |
| Naïve Bayes                   | e1071 package 1.7.13         |                                                                                                                               |
| K Nearest Neighbors           | kknn package 1.3.1           | Default                                                                                                                       |
| Random Forest                 | randomForest package 4.7.1.1 | Default                                                                                                                       |
| Penalized Logistic Regression | glmnet package 4.1.8         | L1 penalty                                                                                                                    |
| Neural network                | tensorflow 2.0               | neurons: 4, activation function: ReLU, hidden layers: 2, learning rate: 0.01, dropout rate: 0.5, batch size: 100, epochs: 150 |
| Extreme Gradient Boosting     | xgboost package 1.7.5.1      | nround: 300                                                                                                                   |

## Supplementary Methods

### *The construction of polygenic risk scores*

The PD-PRS was calculated using the SDPR method[1]. SDPR assumes the model  $y = X\beta + \epsilon$ , where  $X$  is the genotypes,  $\beta$  is the effect sizes, and  $\epsilon_i \sim N(0, \sigma_\epsilon^2)$ . SDPR employs adaptive modeling with a normal mixture distribution and adjusts the likelihood function as  $\hat{\beta}|\beta \sim N(R\beta, \frac{R}{N})$ , where  $R$  is the reference linkage disequilibrium matrix. SDPR does not impose a specific parametric distribution on the effect sizes. Instead, it assumes that the effect size of the  $i^{th}$  SNP  $\beta_i$ , follows a normal distribution with a mean of 0 and a variance of  $\sigma_\beta^2$ , and places a Dirichlet process prior on  $\sigma_\beta^2$ :  $\beta_i \sim N(0, \sigma_\beta^2)$ ,  $\sigma_\beta^2 \sim DP(H_\beta, \alpha)$ , where  $H_\beta$  is the base distribution and  $\alpha$  is the concentration parameter controlling the shrinkage of the distribution on  $\sigma^2$  toward  $H$ . Additionally, SDPR utilizes the block structure of the reference linkage disequilibrium matrix to implement a parallel and fast mixing Markov Chain Monte Carlo algorithm. This is used to obtain posterior samples for estimating the effect sizes. SDPR can be downloaded from <http://github.com/eldronzhou/SDPR>.

## References

1. Zhou, G.; Zhao, H. A fast and robust Bayesian nonparametric method for prediction of complex traits using summary statistics. *PLoS Genet* **2021**, *17*, e1009697, doi:10.1371/journal.pgen.1009697.
